# Supplementary material for: Inferring the timing of abandonment of aggraded alluvial surfaces dated with cosmogenic nuclides
Source: Copernicus journal article supplement (doi:10.5194/esurf-2019-21), 2019-05-22
Supplement: Supplementary file [file esurf-2019-21-AC2-supplement.pdf]

Universität Potsdam • Institut für Geowissenschaften  
Karl-Liebknecht-Str. 24-25 • 14476 Potsdam-Golm GERMANY

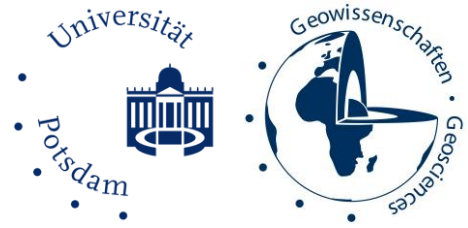

**University of Potsdam  
Institute of Geosciences**

Dr Mitch D'Arcy  
Alexander von Humboldt Postdoctoral Fellow  
mdarcy@uni-potsdam.de

*Telephone:* +49 331 2882 8832  
*Date:* 5<sup>th</sup> July 2019

**Response to reviewer comments of ESurf-2019-21: “Inferring the timing of abandonment of aggraded alluvial surfaces dated with cosmogenic nuclides”**

Dear Reviewer 2,

Thank you for your detailed and constructive review of our manuscript. We are pleased that you like the essence of our work, and we have responded to each of your comments in detail below. We have incorporated many of your suggested changes and we feel the manuscript is now much improved.

Yours sincerely,

A handwritten signature in black ink that reads 'Mitch D'Arcy'.

Dr Mitch D'Arcy  
(on behalf of all authors)

## Reviewer 2: Anonymous

In this manuscript, D'Arcy et al. propose a new probabilistic approach to constrain the timing of alluvial surface abandonment using cosmogenic radionuclide dating of surface boulders. Using randomly sampled surfaces ages from a hypothetical alluvial surface, a distribution of surfaces ages are obtained where both the number of samples and age of the depositional surface are varied. The discrepancy between the ages sampled and the true timing of surface abandonment are then determined. The relationships drawn from this analysis are then also applied to an independently dated alluvial fan system in Mexico to infer the timing of surface abandonment. The manuscript is motivated by better constraining the timing of surface abandonment; the authors suggest that this may be a more useful constraint than an average surface age which is unlikely to relate to any particular forcing or event of interest. In contrast, the timing of abandonment will likely reflect changes in climate, base level change, tectonic forcing or major drainage reorganization. I enjoyed reading this manuscript – it addresses a well thought-out set of questions, is very well written and I believe is a valuable contribution to the field. I would recommend the manuscript for publication pending a few very minor clarifications.

We thank Reviewer 2 for his/her thoughtful review, and we respond to his/her comments below. Reviewer 2 has raised some very interesting questions that we hope will inspire future studies!

I have a general query about boulders and age distributions and their representation. In the conceptual model, it is assumed that boulders are evenly distributed across the surface and that there is a uniform probability distribution of selectable ages. This is mentioned in the experimental assumptions too (section 3.3). I am curious as to how much these two assumptions are likely to modify the modelling results, and whether these assumptions are actually more likely to be the norm in reality. Is this by any chance something that has been examined or tested? The fact that many alluvial surfaces are not characterized by large numbers of large boulders does indeed suggest that their delivery downstream of their source areas may be temporally clustered and correspond to very large events – this may not be relevant given that it is only the youngest ages which matter here. In general, the authors do a thorough job of highlighting the assumptions and limitations of their approaches.

We're pleased that Reviewer 2 thinks we have thoroughly highlighted the assumptions and limitations of our approach, because we want to be upfront about these.

We have not yet performed explicit tests with different distribution shapes of selectable surface ages. One of the reasons for this is simply because it would multiply the analyses in our current manuscript by  $x$  number of different distribution shapes, and each would require a substantial amount of consideration (to work through the predictive relationships and equations), and too many figures and analyses for one paper. However, we do agree that it would make a very interesting question for a future study, which could also bring in a compilation of age clusters from well-sampled alluvial fans in order to empirically look at what shapes these distributions tend to have in the real world.

For our work here, the main implications of changing the shape of selectable age distributions would be to (i) change the number of samples needed to get an accurate estimation of  $T$ ; and (ii) change the value of  $\tau$  for a given probability/number of ages/ $T$ . We can speculate here with two cases:

- 1. Selectable ages are normally-distributed with a peak in the middle of  $T$ .**

A slightly greater number of ages would be needed to estimate  $T$  accurately, because you're more likely to end up sampling ages that cluster around the middle of the depositional

timespan, as opposed to distributed randomly throughout  $T$  like in our scenarios. Therefore, everything in Fig. 6 would probably be shifted down to slightly lower ratios of  $(a_{\max} - a_{\min})/T$ .

Next,  $a_{\min}$  would presumably fall further from  $t_{\text{aban}}$  in many cases, which would make  $\tau$  slightly larger for a given value of  $P$ . The magnitude of this effect might in turn depend on  $n$  and  $T$  (i.e., a bit like Fig. 2). So for small values of  $n$  changing the distribution shape might have a bigger effect, but as  $n$  increases, perhaps the results would become more similar to ours.

## 2. Selectable ages are biased towards the youngest end of $T$ with a long tail decaying towards the older end of $T$ .

Again, slightly more ages would be needed to estimate  $T$  accurately, simply because the sampled ages will always be biased by clustering (wherever the cluster sits within  $T$ ). However in this scenario, you're more likely to densely sample near to the timing of abandonment, which should result in a smaller value of  $\tau$  for a given value of  $n$ ,  $T$ , and  $P$ , i.e., more accurate estimates of abandonment timing.

So, we speculate that different distributions of selectable ages would result in different effects, probably changing the size of  $\tau$  by some small amount. A dedicated study would be needed to pin these effects down. We think that a good way to go would be to start with a compilation of measured ages from natural fans, to see if ages appear to be randomly distributed throughout a timespan, or with a particular distribution shape of the tails.

Section 3.1 – The first time I read this section I was a little confused – it felt like the second paragraph was more observations made from the data rather than a description of methods (line 20-25 in particular). Perhaps some re-phrasing or reordering of material may help with the flow of this section.

We agree that the text needed some clarification here, which was also raised by Reviewer 1. We have edited both section 3.1 and the preceding section 2 (see response to Reviewer 1). We chose to keep the reference to the example case in Fig 1 (referred to as p.4, l.20-25 above) because it illustrates the key advantage of using artificial data and bridges the Justification and the Methods section. However we have added a sentence after this point that explicitly points out why an artificial data approach makes sense, and edited the section to make the text clearer.

Fig. 1B – Could you add a y-axis on the kernel density plot?

In principle we could, yes, but it would be somewhat meaningless because the values would only reflect the size of the x-axis bins used to make the frequency distributions. This is only a cartoon illustration so we feel that would complicate the figure unnecessarily, and we left out the y-axis. Of course, later in the paper the y-axis becomes meaningful when we develop the probabilistic approach, so we do then add y-axis labels.

P4. L4-11. Again, I had to read this paragraph a couple of times over to work out what was a 'true' timing and a 'real' surface – some confusion on what you have modelled and what is a 'real' example. You also do not mention/introduce that you apply the modelling to a case study in either section 1 or 2. Instead, it does feel like it pops slightly out of the blue during the paper discussion. Perhaps integrate this into the end of section 1 where you outline what you are going to present with respect to the artificial data and generation of probabilistic equations.

These are good points. We have edited the paragraph (now p.4, from l.8), also in response to Reviewer 1, to make it clearer. We have rephrased “*real surfaces*” as “*natural surfaces*” for clarity. We also agree about flagging up the case study earlier on; as suggested, we now mention this at the end of section 1.

P9. L13 – I don't think it is unreasonable to say that an average age does not/should not correlate with an external forcing.

This is a good point, this sentence can be phrased in a better way. We have changed (now at p.10, l.16):

*“...our findings indicate that averages of sampled surface ages are likely to be imprecise representations of the mid-point of surface formation, **and** may not **correlate** with **any** external forcing event...”*

to:

*“...our findings indicate that averages of sampled surface ages are likely to be imprecise representations of the mid-point of surface formation, **which** may not **coincide** with **a particular** external forcing event...”*

We agree that our results do not explicitly demonstrate that average surface ages will not correlate with external events. They do demonstrate that average ages will often be imprecise representations of the actual average surface age (i.e., Fig. 3a), so we have kept the first part of the sentence. For the second part, we now simply point out that the average surface age might not coincide with external forcing events, for the reasons we discuss in section 2 (Justification). The mid-point of surface formation is, by definition, in the middle of a period of stability when a surface continues being deposited, unlike when the switch from activity to abandonment occurs.

P.9 L 21. This is probably more for my own curiosity. For the variables you have modelled, you state that 6 to 7 ages are sufficient to characterize the timing of abandonment when  $T = 30$  kyr. You also touch on this in section 5.3 but was wondering if you could just clarify/expand. In your artificial case, the period of surface activity is defined. What if you turn up at a new field site without any indication of how old/period of time each surface has been active for? How many samples are needed/adequate to estimate the timing of surface abandonment to a high degree of probability? Perhaps some idea of the periodicity of forcing mechanism needs to be known (if climatically driven) – but then the argument becomes somewhat circular! Or should we just grab as many samples as we can and state the uncertainty/probability?

These are great questions, and we have been thinking about this issue of how many samples to collect too! It's true that Fig. 3 is referring to the case where  $T = 30$  kyr, but Fig. 4 on the other hand is looking at a wide range of values of  $T$ , and we still see that the curves really start to level off after about 6-7 samples. The value of  $\tau$  is larger when  $T$  is larger, but collecting a few extra samples (say, 10) rarely counteracts the effect of increasing  $T$ . In other words, you don't know what  $T$  is when you're sampling in the field, but whatever number of samples you collect it's unlikely to make much of a difference anyway after ~6 or 7 ages (unless you collect hundreds, which is not feasible). Even if  $T$  happens to be very large, collecting 10 ages rather than 7 still probably won't be enough to offset the effect of  $T$ .

We think it's a really interesting idea that climatic periodicity might be driving the formation of fan surfaces, and therefore might provide a guide for the size of  $T$ . Reviewer 2 is right to point out the risk of circularity, which is why we don't speculate about these questions in this paper, but we are certainly planning to explore this topic in future papers containing data from real alluvial fan systems. We hope our work here inspires other groups to date more fans, because to tackle this question we really need more field examples with well-dated fan surfaces.

Regarding how many samples to collect, our view (based mostly on Fig. 4 and Fig. 6) is that going up to 6 ages will always provide benefits whatever the age/duration of the surface. Collecting more than 6 ages will give smaller and smaller returns, so while it might be useful when especially precise constraints on abandonment are required (e.g., comparing with millennial-scale climate events), it would probably be better to spend those additional resources dating a different surface. The case study from the Baja California fans illustrates this well – the Q4 surface is only dated with 5 ages, but that’s still enough to show fairly convincingly that abandonment overlaps with the Younger Dryas (which only lasted ~1 kyr, so is as short as most palaeoclimate events come). Collecting another 5 ages from that surface would narrow the probability distribution a little bit, but it would probably be a better use of time and money to use those 5 samples to date something else.

One caveat here is that an old outlier was discarded from the Q4 dataset (attributed to nuclide inheritance). So if the goal in the field is to measure ~6 ‘good’ ages, then gathering 1 or 2 extra samples might still be useful in case there are some outliers that need to be thrown out. Given unlimited resources, our strategy would be to process 6 or 7 samples per fan surface, but collect another 1 or 2 samples to keep in reserve. Even if 1 or 2 of the ages turned out to be outliers then the dataset would still probably be fine for inferring abandonment timing (for most purposes). If 3+ outliers turned up, or the project required very precise estimates of abandonment age, then you could go back and process the backups.

This is a bit tangential, but if you’re going out in the field to sample fans, it’s worth taking some free Landsat-8 imagery with you to help choose your sampling sites. We published a paper in *Remote Sensing of Environment* (2018) titled “Alluvial fan surface ages recorded by Landsat-8 imagery in Owens Valley, California”, where we talk about these opportunities. Landsat-8 imagery is a really powerful resource when sampling fans and can make a big difference to ensuring you collect samples from the right patches of the surfaces, and ultimately get robust datasets.

P9. L25 – There is no Fig. 5D.

This was a typo, we have corrected it to Fig. 5b. Thanks for spotting it!

P11. L9 – Should this be Figure 8D?

Corrected.

P12. L12 – If displacement can only occur after surface abandonment, do you have any constraint on a minimum age of displacement onset? Could this estimated time-averaged slip still only be a minimum rate? If so, perhaps state somewhere.

We assume that a faulted surface would start to accumulate a displacement as soon as it’s abandoned (i.e., as soon as it stops being actively resurfaced). That perspective in turn assumes that a fault is continuously slipping, or at least that the time interval between slip events is insignificantly small compared to the age of surface abandonment. It might be that in some cases there is an additional lag time, which would make the time-averaged slip rate a minimum estimate as Reviewer 2 suggests, even when calculated using the abandonment age instead of the average surface age. However we really don’t know whether there is likely to be a lag time in a significant number of cases, so we prefer not to make a general suggestion that time-averaged rates will be minimum estimates. Applied studies will probably need to evaluate this possibility on a case-by-case basis.

P12. L 28-30 This is a really good point – I also feel that this shouldn’t just be in a limitations section! Deriving an average surface age would certainly be biased by burial of older material but by focusing on

the timing of abandonment this bias is removed. Perhaps bring this up earlier in the manuscript as an additional strength of this method.

Thank you! We prefer to avoid repetition in different parts of the manuscript, but we agree that this is a valuable point so we have emphasised it more clearly in the text at p.14, 1.4-12.

## **Additional Edits**

We decided to add a list of mathematical notation (now section 7). This doesn't add much length, but we think it will make it easier for readers to get to grips with our equations.

We have made some very small text edits throughout to improve the wording and clarity of a few sentences. These edits are all shown with tracked changes.

We renamed sub-section 4.3 from '*Application to real surface ages*' to '*Application to measured surface ages*', related to the comments by Reviewer 2 above. We also added a small amount of clarification to this section, just to make sure the text is very clear about how readers could go about applying our approach to their own data (which is ultimately our goal!). For example, here we explain that "*discrete values of  $\tau$  can be converted into a probability distribution by calculating the density of  $P$  within fixed increments of  $\tau$* ". We decided that it would be helpful to briefly expand on this point with two additional sentences that clarify what we mean and also explain how the Matlab script can be used to implement our approach. The section is still concise, but we think it will now be easier for readers to follow Fig. 7 and reproduce our approach with their own data.

Related to Fig. 7, we decided to take out the equations because it isn't necessary to reproduce them in the figure and was a waste of space. Figure 7 is now a single-column figure.

We added a citation to Terrizzano et al. (2017) at p.12, 1.17.
