# Supplementary material for: Inferring the timing of abandonment of aggraded alluvial surfaces dated with cosmogenic nuclides
Source: Copernicus journal article supplement (doi:10.5194/esurf-2019-21), 2019-05-22
Supplement: Supplementary file [file esurf-2019-21-RC1-supplement.pdf]

Let  $X_1, \dots, X_n$  be independent variables following the same law  $X$ , e.g. uniform on  $[0, T]$ . This example is for a surface where  $t_{aban} = 0$ .

We look for the minimum value of  $X$  (which gives  $\tau = X_{min} - 0$ ) given by the law of the minimum

$$M_n = \min\{X_1, \dots, X_n\}. \quad (1)$$

We then calculate the function

$$F_{M_n}(\tau) = 1 - P(M_n > \tau), \quad (2)$$

where

$$P(M_n > t) = P(x_i > t \text{ for any } 1 \leq i \leq n) = P(x > \tau)^n, \quad (3)$$

if and only if all  $X_i$  are  $> \tau$  and independent.

For the uniform law on  $[0, T]$ :

$$P(X > \tau) = 1 - \frac{\tau}{T}. \quad (4)$$

And so, provided  $\frac{\tau}{T} \ll 1$ , we get the following exponential repartition function

$$P(M_n > \tau) = \left(1 - \frac{\tau}{T}\right)^n \simeq e^{-\frac{\tau}{T}n}. \quad (5)$$
